# Supplementary figures and images for: Possible Therapeutic Strategy Involving the Purine Synthesis Pathway Regulated by ITK in Tongue Squamous Cell Carcinoma
Source: MDPI journal article supplement (doi:10.3390/cancers13133333), 2021-07-02

Fig. 1K

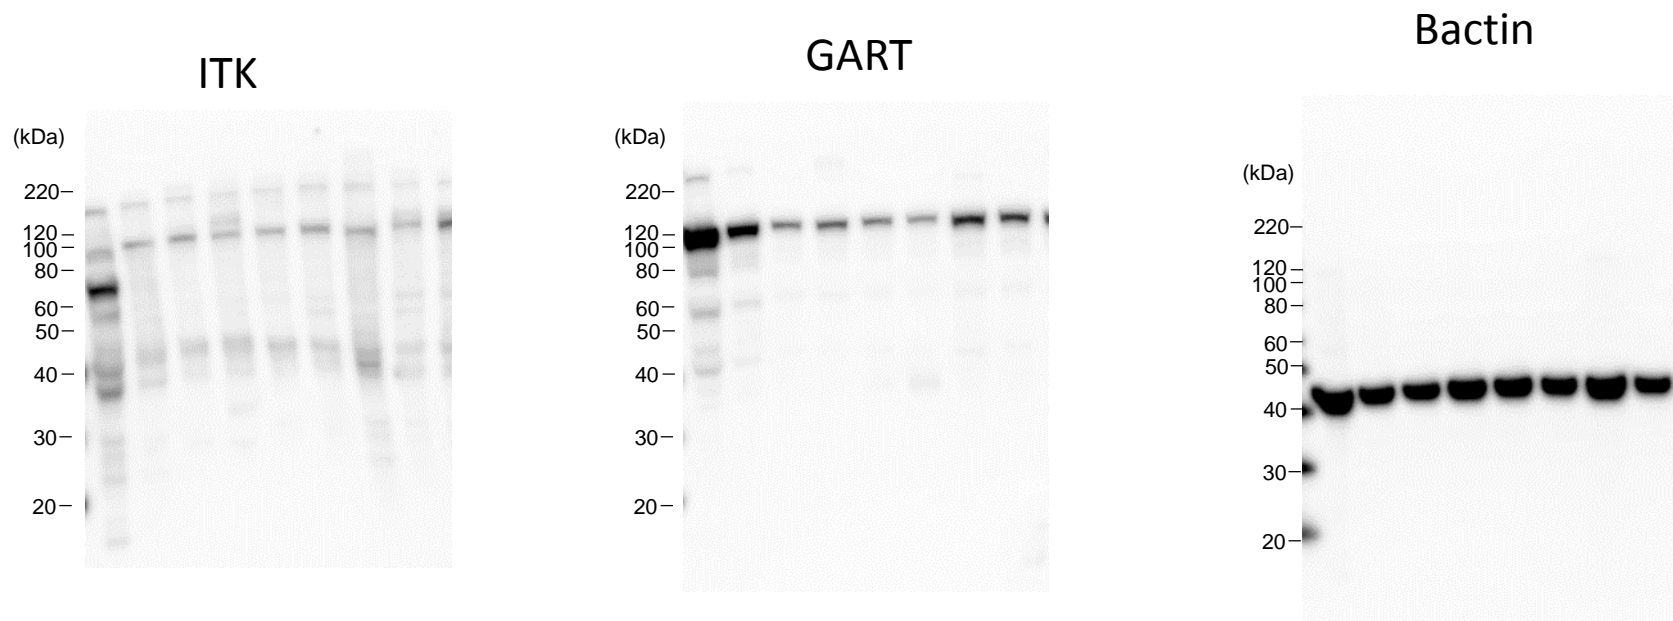

Fig. 1L

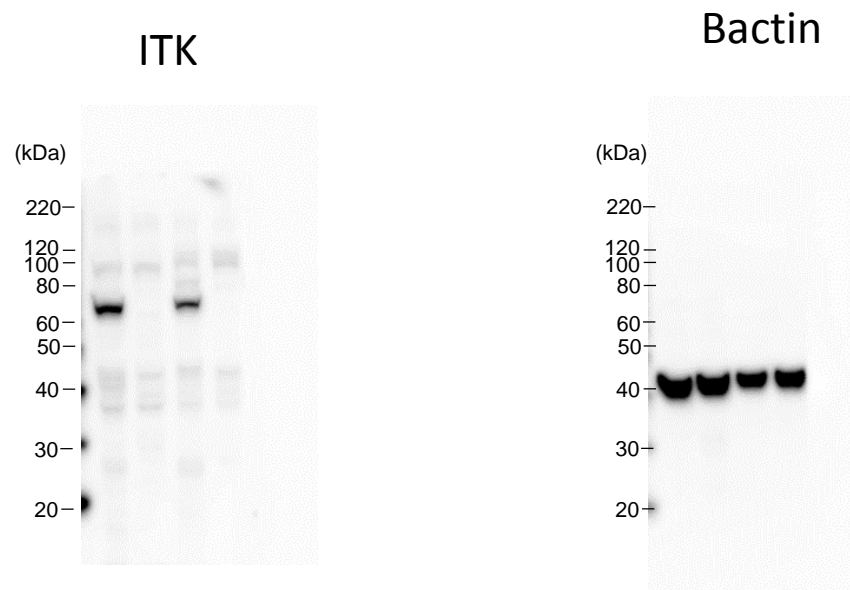

Fig. 2H

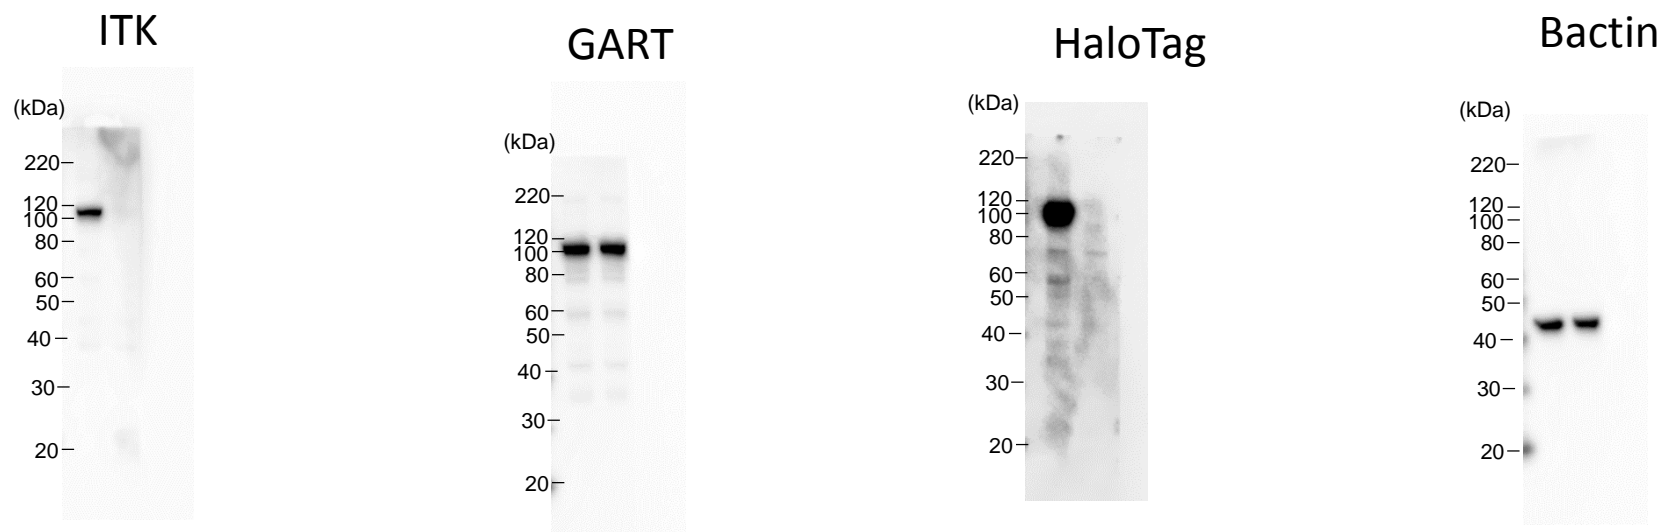

Fig. S2

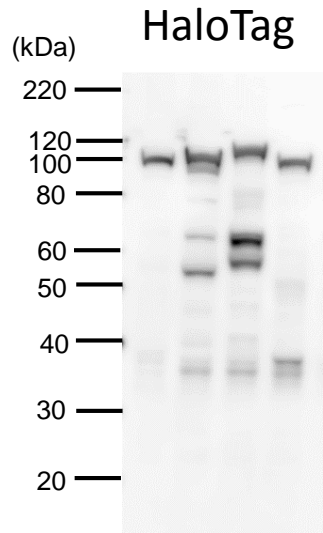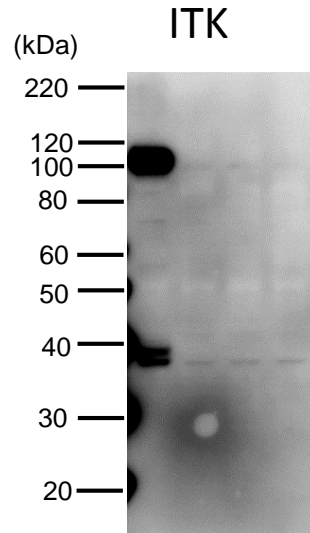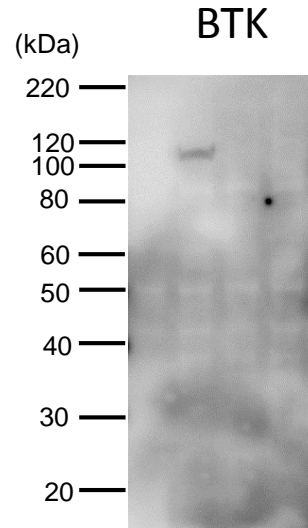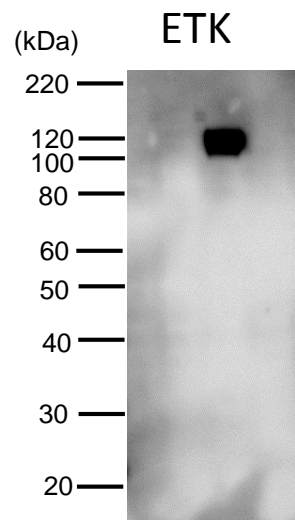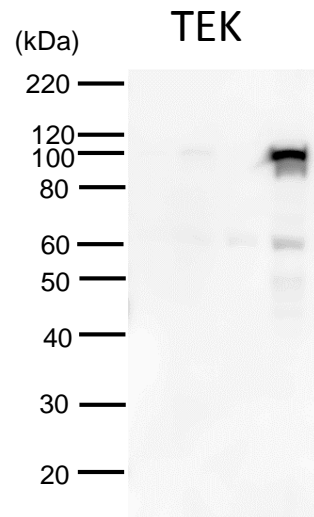

Supplement: s1 [file s1]
